# Supplementary material for: Superconductivity in CaSn3 single crystals with a AuCu3-type structure
Source: Royal Society of Chemistry journal article supplement (doi:10.1039/c5tc02373d), 2015-01-01
Supplement: c5tc02373d1.pdf [file c5tc02373d1.pdf]

## Supporting Information

### Superconductivity in CaSn<sub>3</sub> single crystal with a AuCu<sub>3</sub>-type structure

X. Luo<sup>1†</sup>, D. F. Shao<sup>1†</sup>, Q. L. Pei<sup>1</sup>, J. Y. Song<sup>1</sup>, L. Hu<sup>1</sup>, Y. Y. Han<sup>2</sup>, X. B. Zhu<sup>1</sup>, W. H. Song<sup>1</sup>,  
W. J. Lu<sup>1\*</sup> and Y. P. Sun<sup>1,2,3\*</sup>

<sup>1</sup> Key Laboratory of Materials Physics, Institute of Solid State Physics, Chinese Academy of Sciences, Hefei, 230031, China

<sup>2</sup> High Magnetic Field Laboratory, Chinese Academy of Sciences, Hefei, 230031, China

<sup>3</sup> Collaborative Innovation Center of Advanced Microstructures, Nanjing University, Nanjing, 210093, China

#### Abstract

We report the superconductivity of the CaSn<sub>3</sub> single crystal with a AuCu<sub>3</sub>-type structure, namely cubic space group  $P_{m\bar{3}m}$ . The superconducting transition temperature  $T_C=4.2$  K is determined by the magnetic susceptibility, electrical resistivity, and heat capacity measurements. The magnetization versus magnetic field ( $M$ - $H$ ) curve at low temperatures shows the typical-II superconducting behavior. The estimated lower and upper critical fields are about 125 Oe and 1.79 T, respectively. The penetration depth  $\lambda(0)$  and coherence length  $\xi(0)$  are calculated to be approximately 1147 nm and 136 nm by the Ginzburg-Landau equations. The estimated Sommerfeld coefficient of the normal state  $\gamma_N$  is about 2.9 mJ/mol K<sup>2</sup>.  $\Delta C/\gamma_N T_C=1.13$  and  $\lambda_{ep}=0.65$  suggest that CaSn<sub>3</sub> single crystal is a weakly coupled superconductor. Electronic band structure calculations show a complex multi-sheet Fermi surface formed by three bands and a low density of states (DOS) at the Fermi level, which is consistent with the experimental results. Based on the analysis of electron phonon coupling of AX<sub>3</sub> compounds (A=Ca, La, and Y; X=Sn and Pb), we theoretically proposed a way to increase  $T_C$  in the system.

Electronic mail: [wjlu@issp.ac.cn](mailto:wjlu@issp.ac.cn) and [ypsun@issp.ac.cn](mailto:ypsun@issp.ac.cn)

---

**More experimental details:**

The used crystals were cubic or rectangle shape, we decanted the crystals is about 270 °C, which is higher than the melting point of element Sn (231 °C) and decanting speed is very fast and can reach 1800 round/second within 10 seconds. We did the polishing before doing the measurements, so just little element Sn may be left on the surface.

**Figures:**

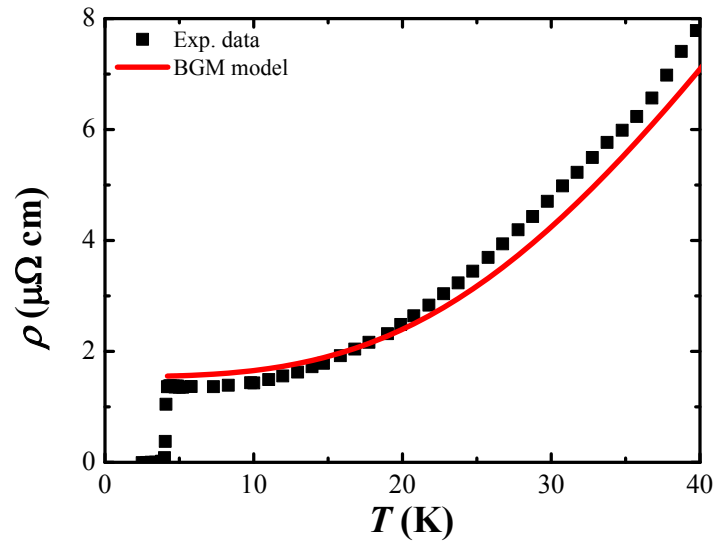

Fig. S1: The fitting result using the BGM model is shown at the low temperature.

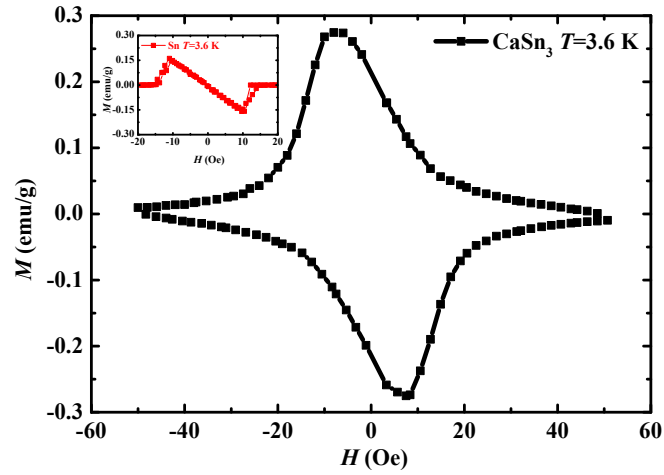

Fig. S2: The comparison of  $M(H)$  between the  $\text{CaSn}_3$  single crystal and element Sn at  $T=3.6 \text{ K}$ .
